# Supplementary material for: Toxic Effects of Methylene Blue on the Growth, Reproduction and Physiology of Daphnia magna
Source: MDPI journal article supplement (doi:10.3390/toxics11070594), 2023-07-07
Supplement: s1 [file s1]

# Toxic Effects of Methylene Blue on the Growth, Reproduction and Physiology of *Daphnia magna*

Shuhui Li <sup>1,†</sup>, Yixin Cui <sup>2,†</sup>, Min Wen <sup>2</sup> and Gaohua Ji <sup>1,2,\*</sup>
**Table S1.** Acute toxicity of methylene blue to aquatic animals.

| Experimental Organism           | Test Results                                                                                                | Reference                 |
|---------------------------------|-------------------------------------------------------------------------------------------------------------|---------------------------|
| <i>Megalobrama terminalis</i>   | 24h LC <sub>50</sub> : 20.22 mg/L<br>48h LC <sub>50</sub> : 11.90 mg/L<br>96h LC <sub>50</sub> : 8.89 mg/L  | (Dai Y et al. 2020)       |
| <i>Litopenaeus Vannamei</i>     | 24h LC <sub>50</sub> : 5.769 mg/L<br>48h LC <sub>50</sub> : 4.698 mg/L                                      | (Zhou G et al. 2020)      |
| <i>Rhodeus ocellatus</i>        | 24h LC <sub>50</sub> : 45.30 mg/L<br>48h LC <sub>50</sub> : 18.76 mg/L                                      | (Chen W et al. 2010)      |
| <i>Limnodilus hoffineisteri</i> | 24h LC <sub>50</sub> : 31.60 mg/L<br>48h LC <sub>50</sub> : 20.60 mg/L<br>96h LC <sub>50</sub> : 18.80 mg/L | (Yin H et al. 2007)       |
| <i>Pimephales promelas</i>      | 96h LC <sub>50</sub> : 45.00 mg/L(20°C )<br>96h LC <sub>50</sub> : 15.00 mg/L(25°C)                         | (Rifici et al. 1996)      |
| <i>Penaeus californiensis</i>   | 1h LC <sub>50</sub> : 100 mg/L                                                                              | (Hanks 1976)              |
| <i>Salmo trutta</i>             | 24h LC <sub>50</sub> : 54 mg/L<br>48h LC <sub>50</sub> : 32.8 mg/L                                          | (Willford WA et al. 1966) |
| <i>Salvelinus fontinalis</i>    | 24h LC <sub>50</sub> : 49.8 mg/L<br>48h LC <sub>50</sub> : 22.9 mg/L                                        |                           |
| <i>Salvelinus namaycush</i>     | 24h LC <sub>50</sub> : 35 mg/L<br>48h LC <sub>50</sub> : 34 mg/L                                            |                           |

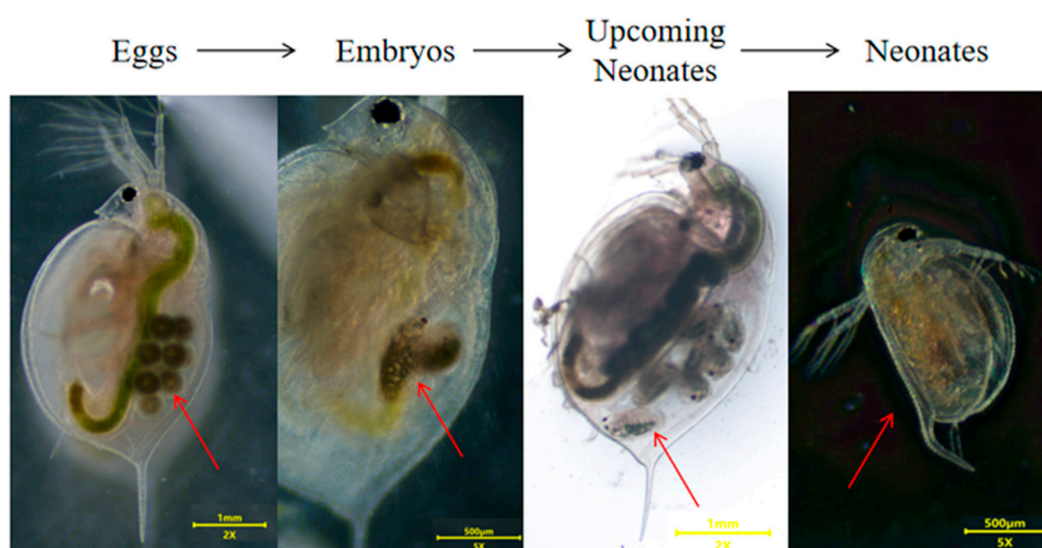

Figure S1. Developmental stages of *Daphnia magna* under the stereomicroscope.

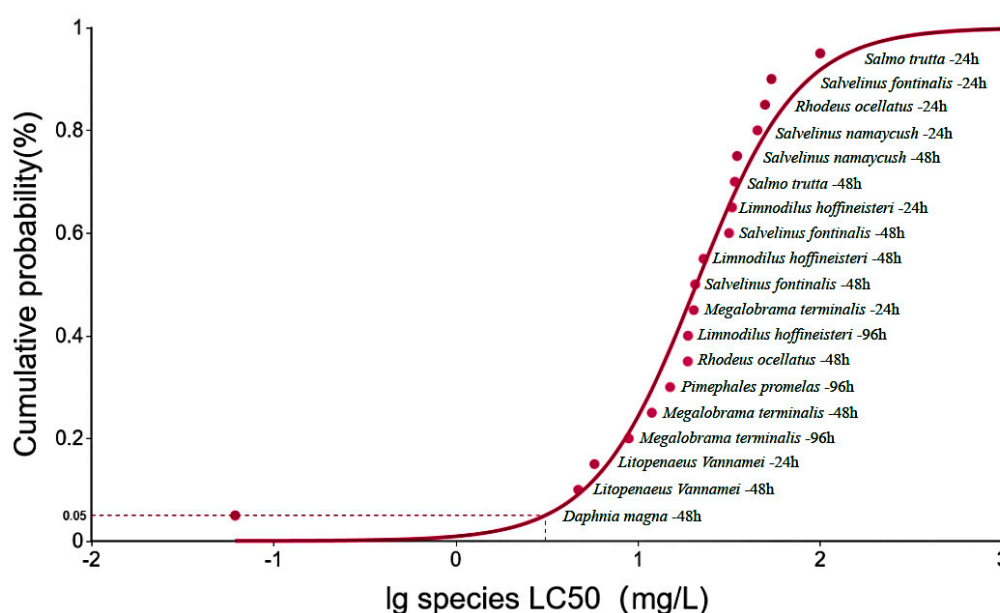

Figure S2. Logistic fitting curve of species mean acute values (SMAV) of methylene blue.

## References

1. Dai Y., Xie N., Ma H.; et al. Acute toxicity test of copper iron mixture, Metrifonate, methylene blue and Povidone-iodine on summerlings of *Megalobrama terminalis* [J]. Fisheries Science & Technology Information, 2020, 47(4):4.DOI:10.16446/j.fsti.20190900124.
2. Zhou G., Ma R., Yang Z.; et al. Acute Toxicity of Prometryn, Phoxim, and Methylene Blue and Their Histopathological Effects on *Penaeus vannamei* [J]. Asian Journal of Ecotoxicology, 2020, 15(06): 279-89.
3. Chen, W., Qu, J., Zhou, F. Study on the acute toxicity of methylene blue to young *Rhodeus Ocellatus* [J]. Guangdong Agricultural Sciences, 2010, 37(05): 131-2.
4. Yin H, Kan X, Shi X; et al. The acute poisoning function of methyl to *Limnodilus hoffineisteri* [J]. Natural Science Journal of Harbin Normal University, 2007, (4): 80-2.
5. Rifici L M, Cherry D S, Farris, J. L.; et al. Acute and subchronic toxicity of methylene blue to larval fathead minnows (*Pimephales promelas*): Implications for aquatic toxicity testing [J]. Environmental Toxicology and Chemistry, 1996, 15(8): 1304-8.

- 
6. Hanks K S. Toxicity of some chemical therapeutics to the commercial shrimp, *Penaeus californiensis* [J]. Aquaculture, 1976, 7: 293-4.
  7. Willford WA;USDOL, FWS, Bur Sport Fish Wildl; Invest Fish Control No.18, Resourc Publ No.35: 10 (1966) as cited in the ECO-TOX database. Available from, as of November28, 2022. [J.].
